# Supplementary material for: Evaluating for a correlation between osteopathic examination and ultrasonography on thoracic spine asymmetry
Source: publisher site journal article supplement (doi:10.1515/jom-2021-0020), 2021-10-13
Supplement: Supplementary file 1 [file j_jom-2021-0020_suppl.xlsx]

## Sheet: overall data
	Noble - ultrasound 1														Nydam - ultrasound 2													Dobrusin - OMM 1									Nakken - OMM2
DATE		T3 TP (cm)			Diagnosis (smaller #)	T4 TP				T5 TP					T3				T4				T5						Significant (yes/no)		Significant (yes/no)		Significant (yes/no)		Significant (yes/no)	Clinically treatable		Significant (yes/no)		Significant (yes/no)		Significant (yes/no)		Significant (yes/no)	Clinically treatable
10.10.19	Subject	L	R	Δ (R-L)		L	R	Δ (R-L)	Diagnosis	L	R	Δ (R-L)	Diagnosis	Most	L	R	Δ (R-L)	Diagnosis	L	R	Δ (R-L)	Diagnosis	L	R	Δ (R-L)	Diagnosis	Most	T2 TP		T3 TP		T4 TP		T5 TP			T2 TP		T3 TP		T4 TP		T5 TP
10.10.19	1	3.31	3.17	-0.14	R	2.87	2.65	-0.22	R	2.37	3.07	0.7	L	T5	3.28	3.6	0.32	L	2.93	2.95	0.02	L	2.65	3.14	0.49	L	T5	LEFT	NO	LEFT	NO	RIGHT	NO	LEFT	YES	T5	LEFT	YES	LEFT	YES	RIGHT	NO	LEFT	NO	T2
10.10.19	2	3.54	3.4	-0.14	R	2.96	2.68	-0.28	R	2.68	2.87	0.19	L	T4	3.35	2.93	-0.42	R	3.1	2.94	-0.16	R	2.97	2.47	-0.5	R	T5	LEFT	NO	RIGHT	YES	LEFT	NO	RIGHT	NO	T3	LEFT	YES	LEFT	YES	LEFT	YES	RIGHT	YES	T2
10.10.19	3	3.78	4.05	0.27	L	3.15	3.12	-0.03	R	3.24	3.14	-0.1	R	T3	3.97	4.34	0.37	L	3.68	3.47	-0.21	R	3.72	3.58	-0.14	R	T3	RIGHT	NO	LEFT	NO	LEFT	NO	RIGHT	YES	T5	LEFT	NO	LEFT	NO	LEFT	YES	LEFT	YES	T4
10.10.19	4	2.35	2.5	0.15	L	2.57	2.71	0.14	L	2.35	2.35	0	NEUTRAL	T3	2.79	2.55	-0.24	R	2.7	2.78	0.08	L	2.53	2.58	0.05	L	T3	LEFT	NO	LEFT	NO	LEFT	YES	LEFT	NO	T4	LEFT	NO	LEFT	YES	LEFT	YES	LEFT	NO	T4
10.10.19	5	3.04	2.98	-0.06	R	2.87	2.65	-0.22	R	3.04	2.88	-0.16	R	T4	3.02	2.8	-0.22	R	3.13	2.98	-0.15	R	2.93	2.86	-0.07	R	T3	LEFT	NO	LEFT	NO	LEFT	NO	RIGHT	YES	T5	RIGHT	NO	LEFT	NO	LEFT	YES	LEFT	YES	T4
10.10.19	7	3.11	2.66	-0.45	R	2.7	3.06	0.36	L	2.71	3	0.29	L	T3	2.78	3.05	0.27	L	2.59	2.82	0.23	L	2.41	2.34	-0.07	R	T3	LEFT	NO	RIGHT	NO	LEFT	NO	RIGHT	YES	T5	LEFT	NO	RIGHT	NO	LEFT	YES	LEFT	NO	T4
10.10.19	8	3.44	3.21	-0.23	R	3.13	3.06	-0.07	R	3.07	3.13	0.06	L	T3	3.62	3.39	-0.23	R	3.41	3.23	-0.18	R	3.01	3.18	0.17	L	T3	LEFT	NO	LEFT	NO	RIGHT	NO	LEFT	YES	T5	LEFT	YES	LEFT	YES	RIGHT	YES	LEFT	YES	T5
10.10.19	9	3.17	3.06	-0.11	R	3.07	2.94	-0.13	R	3.01	3	-0.01	R	T4	3.33	3.38	0.05	L	2.93	3.04	0.11	L	3.14	3.06	-0.08	R	T4	LEFT	NO	LEFT	NO	RIGHT	NO	RIGHT	YES	T5	LEFT	YES	LEFT	NO	RIGHT	YES	LEFT	YES	T2
10.10.19	10	3.6	3.53	-0.07	R	3.56	3.4	-0.16	R	3.39	3.18	-0.21	R	T5	3.55	3.53	-0.02	R	3.62	3.43	-0.19	R	3.56	3.4	-0.16	R	T4	RIGHT	NO	LEFT	NO	LEFT	YES	LEFT	NO	T4	RIGHT	NO	LEFT	YES	LEFT	NO	LEFT	NO	T3
10.10.19	11	3.35	3.36	0.01	L	2.87	3.04	0.17	L	2.77	2.85	0.08	L	T4	2.94	3.26	0.32	L	2.81	2.71	-0.1	R	2.85	2.6	-0.25	R	T3	LEFT	NO	LEFT	NO	LEFT	YES	RIGHT	NO	T4	RIGHT	NO	RIGHT	YES	LEFT	YES	LEFT	YES	T4
10.10.19	12	3.15	2.55	-0.6	R	2.79	2.51	-0.28	R	2.81	2.6	-0.21	R	T3	3.08	2.63	-0.45	R	2.88	2.57	-0.31	R	2.47	2.47	0	NEUTRAL	T3	RIGHT	NO	RIGHT	NO	LEFT	YES	LEFT	YES	T5	LEFT	NO	RIGHT	NO	LEFT	YES	LEFT	YES	T5
11.14.19	2	3.67	3.72	0.05	L	3.32	3.92	0.6	L	4.23	4.56	0.33	L	T4	3.51	3.41	-0.1	R	3.32	3.17	-0.15	R	3.31	3.45	0.14	L	T4	LEFT	NO	RIGHT	NO	RIGHT	YES	LEFT	NO	T4	LEFT	YES	LEFT	NO	RIGHT	YES	RIGHT	YES	T4
11.14.19	3	3.21	3.1	-0.11	R	3.22	2.59	-0.63	R	3.26	2.87	-0.39	R	T4	3.23	3	-0.23	R	2.9	3.03	0.13	L	2.97	2.62	-0.35	R	T5	LEFT	NO	LEFT	NO	LEFT	NO	RIGHT	YES	T5	RIGHT	NO	LEFT	NO	LEFT	NO	LEFT	YES	T5
11.14.19	5	3.44	3.35	-0.09	R	3.03	3.07	0.04	L	2.89	3.14	0.25	L	T5	3.37	3.25	-0.12	R	3.14	3.15	0.01	L	2.89	3.17	0.28	L	T5	RIGHT	NO	RIGHT	NO	LEFT	NO	RIGHT	YES	T5	RIGHT	NO	RIGHT	YES	LEFT	YES	RIGHT	YES	T5
11.14.19	6	3.37	3.03	-0.34	R	2.99	3.05	0.06	L	3.11	3.07	-0.04	R	T3	2.96	2.91	-0.05	R	2.7	3	0.3	L	2.99	3.16	0.17	L	T5	LEFT	NO	LEFT	YES	RIGHT	NO	RIGHT	NO	T3	LEFT	YES	RIGHT	NO	LEFT	YES	RIGHT	YES	T5
11.14.19	7	3.15	3.43	0.28	L	3.32	3.21	-0.11	R	3.52	3.34	-0.18	R	T3	3.28	3.13	-0.15	R	3.26	3.19	-0.07	R	3.27	3.21	-0.06	R	T3	LEFT	NO	LEFT	NO	RIGHT	NO	LEFT	YES	T5	RIGHT	NO	RIGHT	YES	LEFT	YES	RIGHT	YES	T4
11.14.19	8	3.23	3.24	0.01	L	3.07	2.74	-0.33	R	2.88	2.62	-0.26	R	T4	3	2.98	-0.02	R	3.03	2.79	-0.24	R	3.01	2.82	-0.19	R	T4	RIGHT	NO	LEFT	NO	LEFT	YES	RIGHT	NO	T4	LEFT	NO	RIGHT	YES	RIGHT	YES	RIGHT	YES	T5
11.14.19	9	3.69	3.76	0.07	L	3.55	3.51	-0.04	R	3.41	3.77	0.36	L	T5	3.75	3.97	0.22	L	3.92	3.88	-0.04	R	3.56	3.62	0.06	L	T3	LEFT	NO	LEFT	NO	LEFT	NO	RIGHT	YES	T5	LEFT	YES	RIGHT	YES	RIGHT	NO	RIGHT	NO	T2
11.14.19	10	3.63	3.57	-0.06	R	3.47	3.51	0.04	L	2.8	3.01	0.21	L	T5	3.61	3.47	-0.14	R	3.5	3.57	0.07	L	3.3	3.69	0.39	L	T5	LEFT	NO	RIGHT	NO	LEFT	YES	LEFT	YES	T4	LEFT	NO	LEFT	YES	LEFT	YES	LEFT	YES	T5
11.14.19	11	2.92	2.88	-0.04	R	2.83	3.01	0.18	L	2.91	2.93	0.02	L	T4	2.96	2.95	-0.01	R	2.67	2.8	0.13	L	2.41	2.53	0.12	L	T4	LEFT	NO	LEFT	NO	LEFT	YES	RIGHT	NO	T4	LEFT	YES	LEFT	YES	LEFT	NO	RIGHT	YES	T2
11.14.19	12	2.58	2.88	0.3	L	2.73	2.82	0.09	L	2.74	2.99	0.25	L	T3	3.07	2.78	-0.29	R	2.56	2.82	0.26	L	2.51	2.91	0.4	L	T5	LEFT	NO	LEFT	NO	RIGHT	YES	LEFT	NO	T4	LEFT	YES	RIGHT	NO	RIGHT	YES	LEFT	YES	T5
11.14.19	13	3.85	3.97	0.12	L	3.75	3.54	-0.21	R	3.57	3.72	0.15	L	T4	3.76	3.8	0.04	L	3.16	3.75	0.59	L	3.33	3.43	0.1	L	T4	RIGHT	NO	LEFT	NO	RIGHT	NO	RIGHT	YES	T5	RIGHT	YES	RIGHT	NO	RIGHT	NO	RIGHT	YES	T2
11.14.19	14	3.63	3.74	0.11	L	3.2	3.29	0.09	L	3.2	3.35	0.15	L	T5	3.49	3.59	0.1	L	3.14	3.15	0.01	L	3	3.21	0.21	L	T5	LEFT	NO	LEFT	NO	RIGHT	NO	LEFT	YES	T5	LEFT	NO	RIGHT	NO	LEFT	YES	LEFT	YES	T5
11.14.19	15	3.23	2.82	-0.41	R	3.05	3.08	0.03	L	3.04	3.03	-0.01	R	T3	2.9	2.81	-0.09	R	3.01	2.9	-0.11	R	2.89	2.88	-0.01	R	T4	LEFT	NO	LEFT	NO	LEFT	NO	LEFT	YES	T5	RIGHT	YES	RIGHT	NO	RIGHT	YES	LEFT	YES	T5
11.14.19	16	3.5	3.4	-0.1	R	3.27	3.2	-0.07	R	3.23	3.2	-0.03	R	T3	3.4	3.36	-0.04	R	2.99	3.1	0.11	L	3.17	2.88	-0.29	R	T5	LEFT	NO	RIGHT	NO	LEFT	NO	LEFT	YES	T5	RIGHT	YES	LEFT	NO	LEFT	YES	LEFT	YES	T4
11.14.19	17	3.38	3.42	0.04	L	2.92	3.34	0.42	L	3.86	3.34	-0.52	R	T5	3.5	3.41	-0.09	R	3.02	3.59	0.57	L	2.92	2.94	0.02	L	T4	LEFT	NO	RIGHT	YES	RIGHT	NO	LEFT	NO	T3	LEFT	YES	LEFT	YES	RIGHT	NO	LEFT	NO	T2
12.12.19	1	3.39	3.49	0.1	L	3.16	3.15	-0.01	R	3.18	3.32	0.14	L	T5	3.12	3.11	-0.01	R	3.16	3.16	0	NEUTRAL	3.15	3.33	0.18	L	T5	RIGHT	NO	LEFT	NO	LEFT	YES	LEFT	NO	T4	LEFT	YES	RIGHT	NO	LEFT	YES	LEFT	NO	T2
12.12.19	2	2.8	2.71	-0.09	R	2.89	2.83	-0.06	R	3.73	3.78	0.05	L	T3	3.2	3.69	0.49	L	2.38	2.24	-0.14	R	2.3	2.22	-0.08	R	T3	LEFT	NO	RIGHT	YES	RIGHT	NO	RIGHT	NO	T3	LEFT	YES	RIGHT	YES	LEFT	NO	RIGHT	NO	T3
12.12.19	3	3.19	2.87	-0.32	R	2.76	2.71	-0.05	R	2.74	3.05	0.31	L	T3	2.91	3.2	0.29	L	2.92	2.57	-0.35	R	2.85	2.63	-0.22	R	T4	LEFT	NO	LEFT	NO	LEFT	NO	RIGHT	YES	T5	RIGHT	NO	LEFT	NO	LEFT	YES	LEFT	YES	T4
12.12.19	4	3.93	3.56	-0.37	R	3.8	3.69	-0.11	R	3.39	3.4	0.01	L	T3	3.56	3.86	0.3	L	3.4	3.56	0.16	L	3.38	3.38	0	NEUTRAL	T3	RIGHT	NO	LEFT	NO	LEFT	NO	LEFT	YES	T5	RIGHT	YES	LEFT	YES	LEFT	YES	LEFT	YES	T3
12.12.19	5	3.31	3.85	0.54	L	3.72	3.35	-0.37	R	3.34	3.52	0.18	L	T3	3.3	3.86	0.56	L	3.58	3.3	-0.28	R	3.06	3.77	0.71	L	T5	LEFT	NO	RIGHT	NO	LEFT	YES	RIGHT	NO	T4	LEFT	YES	LEFT	YES	LEFT	NO	LEFT	NO	T2
12.12.19	6	3.64	2.93	-0.71	R	3.04	3.07	0.03	L	3.06	3.19	0.13	L	T3	3.43	3.17	-0.26	R	3.01	2.94	-0.07	R	3.2	3.31	0.11	L	T3	LEFT	NO	RIGHT	NO	LEFT	NO	RIGHT	YES	T5	LEFT	YES	RIGHT	NO	LEFT	YES	LEFT	NO	T2
12.12.19	8	4.02	3.6	-0.42	R	3.01	3.09	0.08	L	3.37	3.04	-0.33	R	T3	3.57	3.59	0.02	L	2.72	3.08	0.36	L	2.71	2.6	-0.11	R	T4	LEFT	NO	RIGHT	NO	LEFT	YES	RIGHT	NO	T4	LEFT	YES	RIGHT	YES	RIGHT	YES	LEFT	YES	T3
12.12.19	9	3.14	3.52	0.38	L	3.25	3.23	-0.02	R	3.22	2.95	-0.27	R	T3	2.99	3.24	0.25	L	3.1	3.22	0.12	L	3.3	2.94	-0.36	R	T5	LEFT	NO	RIGHT	NO	LEFT	NO	LEFT	YES	T5	RIGHT	NO	RIGHT	YES	RIGHT	YES	RIGHT	NO	T4
12.12.19	10	3.17	3.02	-0.15	R	3.13	3.21	0.08	L	2.87	2.97	0.1	L	T3	2.9	2.89	-0.01	R	2.67	2.87	0.2	L	2.7	2.99	0.29	L	T5	LEFT	NO	RIGHT	NO	LEFT	NO	LEFT	YES	T5	LEFT	NO	RIGHT	YES	LEFT	NO	LEFT	NO	T3
12.12.19	11	3.38	3.29	-0.09	R	2.97	3.16	0.19	L	2.89	2.96	0.07	L	T4	2.75	2.95	0.2	L	2.63	2.9	0.27	L	2.67	2.7	0.03	L	T4	LEFT	NO	RIGHT	NO	LEFT	YES	LEFT	NO	T4	RIGHT	NO	LEFT	NO	LEFT	YES	LEFT	YES	T5
12.12.19	12	3.32	3.16	-0.16	R	2.85	2.81	-0.04	R	3.22	2.31	-0.91	R	T5	3.2	3.26	0.06	L	2.77	2.46	-0.31	R	2.96	2.34	-0.62	R	T5	LEFT	NO	LEFT	NO	RIGHT	YES	RIGHT	YES	T4	LEFT	YES	LEFT	YES	LEFT	YES	RIGHT	YES	T2
12.12.19	14	3.31	3.37	0.06	L	3.01	3.1	0.09	L	2.95	2.91	-0.04	R	T4	3.2	3	-0.2	R	2.56	2.9	0.34	L	3	2.77	-0.23	R	T4	LEFT	NO	RIGHT	NO	LEFT	YES	RIGHT	NO	T4	LEFT	NO	LEFT	YES	LEFT	YES	RIGHT	NO	T4
12.12.19	15	2.96	2.88	-0.08	R	3.03	2.48	-0.55	R	2.96	3.01	0.05	L	T4	2.85	2.65	-0.2	R	3.02	2.62	-0.4	R	2.68	2.67	-0.01	R	T4	LEFT	NO	RIGHT	NO	RIGHT	NO	LEFT	YES	T5	LEFT	YES	LEFT	YES	LEFT	NO	LEFT	YES	T2
12.12.19	16	3.42	3.18	-0.24	R	3.07	3.13	0.06	L	3.34	3.02	-0.32	R	T5	3.62	3.33	-0.29	R	3.07	2.8	-0.27	R	3.04	2.67	-0.37	R	T5	RIGHT	NO	RIGHT	NO	LEFT	NO	RIGHT	YES	T5	RIGHT	YES	RIGHT	NO	LEFT	NO	LEFT	NO	T2
12.12.19	17	3.28	2.95	-0.33	R	3.26	3.07	-0.19	R	3.07	3.28	0.21	L	T3	3.22	2.91	-0.31	R	3.22	2.91	-0.31	R	2.73	2.97	0.24	L	T3/T4	LEFT	NO	RIGHT	NO	LEFT	YES	RIGHT	NO	T4	LEFT	YES	LEFT	NO	RIGHT	YES	LEFT	YES	T5
1.13.20	1	3.4	2.78	-0.62	R	3.01	2.9	-0.11	R	2.73	2.86	0.13	L	T3	2.9	2.99	0.09	L	2.53	2.96	0.43	L	2.56	2.98	0.42	L	T4	LEFT	NO	RIGHT	NO	RIGHT	YES	LEFT	NO	T4	RIGHT	NO	RIGHT	YES	LEFT	NO	LEFT	YES	T5
1.13.20	2	3.13	3.1	-0.03	R	2.8	2.96	0.16	L	2.92	3.07	0.15	L	T4	3.11	3.16	0.05	L	2.5	3.22	0.72	L	2.81	3.06	0.25	L	T4	LEFT	NO	LEFT	NO	RIGHT	NO	LEFT	YES	T5	LEFT	YES	LEFT	NO	LEFT	YES	LEFT	YES	T2
1.13.20	3	3.34	3.6	0.26	L	3.64	3.82	0.18	L	3.75	3.47	-0.28	R	T5	3.38	3.48	0.1	L	3.5	3.46	-0.04	R	3.49	3.4	-0.09	R	T3	LEFT	NO	RIGHT	YES	LEFT	NO	RIGHT	NO	T3	RIGHT	YES	RIGHT	NO	LEFT	YES	LEFT	YES	T2
1.13.20	4	2.94	3.17	0.23	L	2.9	2.91	0.01	L	2.56	2.82	0.26	L	T5	2.69	2.74	0.05	L	2.79	2.58	-0.21	R	2.67	2.24	-0.43	R	T5	LEFT	NO	RIGHT	NO	LEFT	YES	RIGHT	NO	T4	LEFT	NO	RIGHT	NO	RIGHT	YES	RIGHT	YES	T5
1.13.20	5	3.81	3.25	-0.56	R	3.79	3.21	-0.58	R	3.38	3.32	-0.06	R	T4	4.18	3.42	-0.76	R	3.65	3.14	-0.51	R	3.24	3.25	0.01	L	T3	RIGHT	NO	LEFT	NO	RIGHT	YES	LEFT	NO	T4	RIGHT	NO	LEFT	YES	LEFT	YES	LEFT	YES	T4
1.13.20	6	3.49	3.43	-0.06	R	3.45	3.32	-0.13	R	3.02	3.26	0.24	L	T5	3.25	3.44	0.19	L	3.3	3.36	0.06	L	3.11	3.27	0.16	L	T3	RIGHT	NO	RIGHT	NO	LEFT	YES	LEFT	NO	T4	LEFT	YES	RIGHT	NO	LEFT	YES	LEFT	YES	T5
1.13.20	7	3.2	3.06	-0.14	R	3.2	2.67	-0.53	R	3.09	2.88	-0.21	R	T4	3.25	2.86	-0.39	R	3.13	2.53	-0.6	R	2.77	2.61	-0.16	R	T4	RIGHT	NO	RIGHT	NO	LEFT	NO	LEFT	YES	T5	RIGHT	NO	LEFT	NO	LEFT	YES	LEFT	YES	T5
1.13.20	8	3.49	3.52	0.03	L	3.29	3.37	0.08	L	3.51	2.98	-0.53	R	T5	3.5	3.27	-0.23	R	3.33	2.93	-0.4	R	3.12	2.97	-0.15	R	T4	LEFT	NO	RIGHT	YES	LEFT	NO	RIGHT	NO	T3	LEFT	YES	LEFT	YES	RIGHT	NO	RIGHT	NO	T3
1.13.20	9	2.96	2.83	-0.13	R	2.7	2.68	-0.02	R	2.98	2.76	-0.22	R	T5	2.68	2.79	0.11	L	2.65	2.8	0.15	L	2.84	2.74	-0.1	R	T4	RIGHT	NO	RIGHT	NO	LEFT	YES	RIGHT	NO	T4	RIGHT	NO	LEFT	YES	LEFT	YES	LEFT	YES	T5
1.13.20	10	3.21	3.01	-0.2	R	3.37	3.02	-0.35	R	2.98	2.99	0.01	L	T4	3.17	2.81	-0.36	R	3.2	2.86	-0.34	R	3.04	2.63	-0.41	R	T5	RIGHT	NO	RIGHT	NO	LEFT	YES	LEFT	NO	T4	RIGHT	NO	RIGHT	NO	LEFT	YES	LEFT	YES	T5
1.13.20	12	3.21	3.45	0.24	L	3.2	3.14	-0.06	R	2.92	3.23	0.31	L	T5	2.86	3.05	0.19	L	2.79	2.94	0.15	L	2.64	2.67	0.03	L	T3	LEFT	NO	LEFT	NO	RIGHT	NO	LEFT	YES	T5	LEFT	NO	LEFT	YES	RIGHT	YES	LEFT	YES	T3
1.13.20	13	3.04	2.9	-0.14	R	2.79	2.72	-0.07	R	2.84	2.44	-0.4	R	T5	2.91	2.78	-0.13	R	2.55	2.68	0.13	L	2.56	2.32	-0.24	R	T5	LEFT	NO	RIGHT	YES	LEFT	NO	LEFT	YES	T5	LEFT	YES	RIGHT	NO	LEFT	YES	LEFT	YES	T4
1.13.20	14	3.64	3.73	0.09	L	3.92	3.76	-0.16	R	3.33	3.79	0.46	L	T5	3.47	3.54	0.07	L	3.37	3.5	0.13	L	3.21	3.82	0.61	L	T5	RIGHT	NO	RIGHT	NO	RIGHT	YES	LEFT	NO	T4	LEFT	YES	RIGHT	NO	LEFT	NO	LEFT	YES	T2
1.13.20	15	3.38	3.67	0.29	L	3.55	3.25	-0.3	R	3.54	3.26	-0.28	R	T4	3.29	3.49	0.2	L	3.66	2.76	-0.9	R	3.4	2.65	-0.75	R	T5	LEFT	NO	LEFT	NO	RIGHT	NO	LEFT	YES	T5	LEFT	YES	RIGHT	YES	RIGHT	YES	LEFT	YES	T5
1.30.20	2	3.29	3.08	-0.21	R	3.31	2.75	-0.56	R	3.29	2.67	-0.62	R	T5	3.41	3.31	-0.1	R	3.14	2.98	-0.16	R	3.01	2.82	-0.19	R	T5	LEFT	NO	RIGHT	NO	LEFT	NO	LEFT	YES	T5	LEFT	YES	LEFT	NO	RIGHT	NO	RIGHT	YES	T5
1.30.20	3	3.3	3.36	0.06	L	3.27	3.66	0.39	L	3.4	3.72	0.32	L	T4	3.12	3.11	-0.01	R	3.47	3.14	-0.33	R	2.88	2.94	0.06	L	T4	RIGHT	NO	RIGHT	YES	RIGHT	NO	LEFT	NO	T3	RIGHT	YES	RIGHT	YES	RIGHT	YES	LEFT	YES	T4
1.30.20	4	2.91	2.78	-0.13	R	2.63	2.66	0.03	L	2.78	2.36	-0.42	R	T5	3.03	2.98	-0.05	R	2.75	2.65	-0.1	R	2.44	2.27	-0.17	R	T5	LEFT	NO	RIGHT	NO	LEFT	YES	RIGHT	NO	T4	LEFT	YES	RIGHT	NO	LEFT	YES	LEFT	NO	T4
1.30.20	5	3.17	3.01	-0.16	R	2.89	2.97	0.08	L	2.79	3	0.21	L	T5	2.85	3.08	0.23	L	2.86	3.16	0.3	L	2.73	2.51	-0.22	R	T4	LEFT	NO	LEFT	YES	RIGHT	NO	LEFT	YES	T5	LEFT	YES	RIGHT	NO	LEFT	YES	LEFT	YES	T5
1.30.20	6	3	3.02	0.02	L	2.78	2.82	0.04	L	2.68	2.48	-0.2	R	T5	2.91	2.9	-0.01	R	2.5	2.55	0.05	L	2.24	2.04	-0.2	R	T5	LEFT	NO	RIGHT	NO	LEFT	NO	LEFT	YES	T5	LEFT	NO	LEFT	NO	RIGHT	YES	RIGHT	YES	T5
1.30.20	7	3.76	3.68	-0.08	R	3.73	3.44	-0.29	R	3.62	3.52	-0.1	R	T4	3.41	3.23	-0.18	R	3.19	3.2	0.01	L	3.33	3.16	-0.17	R	T3	LEFT	NO	LEFT	NO	RIGHT	NO	LEFT	YES	T5	RIGHT	NO	LEFT	YES	RIGHT	NO	LEFT	YES	T5
1.30.20	8	3.08	3.13	0.05	L	3.07	2.87	-0.2	R	2.99	2.76	-0.23	R	T5	3.07	3.14	0.07	L	3.12	2.75	-0.37	L	2.91	2.8	-0.11	L	T4	LEFT	NO	LEFT	NO	RIGHT	NO	RIGHT	YES	T5	RIGHT	NO	LEFT	YES	LEFT	YES	RIGHT	NO	T4
1.30.20	9	3.36	3.01	-0.35	R	3.19	2.85	-0.34	R	2.53	3.05	0.52	L	T5	3.4	2.77	-0.63	R	2.84	2.87	0.03	L	2.74	2.83	0.09	L	T3	RIGHT	NO	LEFT	NO	RIGHT	YES	LEFT	YES	T4	RIGHT	NO	LEFT	YES	RIGHT	NO	RIGHT	NO	T3
1.30.20	10	2.87	2.79	-0.08	R	2.79	3.07	0.28	L	2.72	2.79	0.07	L	T4	2.76	3.06	0.3	L	2.89	2.77	-0.12	R	3.06	2.8	-0.26	R	T3	LEFT	NO	LEFT	YES	RIGHT	NO	LEFT	YES	T3	LEFT	NO	LEFT	NO	LEFT	YES	LEFT	YES	T4
1.30.20	11	3.48	3.41	-0.07	R	3.32	2.79	-0.53	R	2.8	2.65	-0.15	R	T4	3.89	3.36	-0.53	R	3.14	2.82	-0.32	R	2.52	2.49	-0.03	R	T3	RIGHT	NO	LEFT	NO	LEFT	YES	RIGHT	NO	T4	RIGHT	NO	RIGHT	YES	LEFT	YES	LEFT	YES	T4
1.30.20	12	3.96	3.89	-0.07	R	3.46	3.54	0.08	L	3.09	3.21	0.12	L	T5	3.72	3.93	0.21	L	3.42	2.94	-0.48	R	3.16	3.09	-0.07	R	T4	LEFT	NO	LEFT	NO	RIGHT	YES	LEFT	NO	T4	LEFT	YES	LEFT	YES	RIGHT	NO	RIGHT	YES	T3
TOTAL	66

## Sheet: SP ref, US avg
	Noble - ultrasound 1														Nydam - ultrasound 2													Dobrusin - OMM 1												Nakken - OMM2
DATE		T2 SP (cm)			Diagnosis (smaller #)	T3 SP				T4 SP					T2 SP				T3 SP				T4 SP							Significant (yes/no)			Significant (yes/no)			Significant (yes/no)		Significant (yes/no)	Clinically treatable			Significant (yes/no)			Significant (yes/no)			Significant (yes/no)
10.10.19	Subject	L	R	Δ (R-L)		L	R	Δ (R-L)	Diagnosis	L	R	Δ (R-L)	Diagnosis	Most	L	R	Δ (R-L)	Diagnosis	L	R	Δ (R-L)	Diagnosis	L	R	Δ (R-L)	Diagnosis	Most	T2 TP	T2 SP		T3 TP	T3 SP		T4 TP	T4 SP		T5 TP			T2 TP	T2 SP		T3 TP	T3 SP		T4 TP	T4 SP		T5 TP
10.10.19	1	3.31	3.17	-0.14	R	2.87	2.65	-0.22	R	2.37	3.07	0.7	L	T5	3.28	3.6	0.32	L	2.93	2.95	0.02	L	2.65	3.14	0.49	L	T5	LEFT	R	NO	LEFT	R	NO	RIGHT	L	NO	LEFT	YES	T5	LEFT	R	YES	LEFT	R	YES	RIGHT	L	NO	LEFT
10.10.19	2	3.54	3.4	-0.14	R	2.96	2.68	-0.28	R	2.68	2.87	0.19	L	T4	3.35	2.93	-0.42	R	3.1	2.94	-0.16	R	2.97	2.47	-0.5	R	T5	LEFT	R	NO	RIGHT	L	YES	LEFT	R	NO	RIGHT	NO	T3	LEFT	R	YES	LEFT	R	YES	LEFT	R	YES	RIGHT
10.10.19	3	3.78	4.05	0.27	L	3.15	3.12	-0.03	R	3.24	3.14	-0.1	R	T3	3.97	4.34	0.37	L	3.68	3.47	-0.21	R	3.72	3.58	-0.14	R	T3	RIGHT	L	NO	LEFT	R	NO	LEFT	R	NO	RIGHT	YES	T5	LEFT	R	NO	LEFT	R	NO	LEFT	R	YES	LEFT
10.10.19	4	2.35	2.5	0.15	L	2.57	2.71	0.14	L	2.35	2.35	0	NEUTRAL	T3	2.79	2.55	-0.24	R	2.7	2.78	0.08	L	2.53	2.58	0.05	L	T3	LEFT	R	NO	LEFT	R	NO	LEFT	R	YES	LEFT	NO	T4	LEFT	R	NO	LEFT	R	YES	LEFT	R	YES	LEFT
10.10.19	5	3.04	2.98	-0.06	R	2.87	2.65	-0.22	R	3.04	2.88	-0.16	R	T4	3.02	2.8	-0.22	R	3.13	2.98	-0.15	R	2.93	2.86	-0.07	R	T3	LEFT	R	NO	LEFT	R	NO	LEFT	R	NO	RIGHT	YES	T5	RIGHT	L	NO	LEFT	R	NO	LEFT	R	YES	LEFT
10.10.19	7	3.11	2.66	-0.45	R	2.7	3.06	0.36	L	2.71	3	0.29	L	T3	2.78	3.05	0.27	L	2.59	2.82	0.23	L	2.41	2.34	-0.07	R	T3	LEFT	R	NO	RIGHT	L	NO	LEFT	R	NO	RIGHT	YES	T5	LEFT	R	NO	RIGHT	L	NO	LEFT	R	YES	LEFT
10.10.19	8	3.44	3.21	-0.23	R	3.13	3.06	-0.07	R	3.07	3.13	0.06	L	T3	3.62	3.39	-0.23	R	3.41	3.23	-0.18	R	3.01	3.18	0.17	L	T3	LEFT	R	NO	LEFT	R	NO	RIGHT	L	NO	LEFT	YES	T5	LEFT	R	YES	LEFT	R	YES	RIGHT	L	YES	LEFT
10.10.19	9	3.17	3.06	-0.11	R	3.07	2.94	-0.13	R	3.01	3	-0.01	R	T4	3.33	3.38	0.05	L	2.93	3.04	0.11	L	3.14	3.06	-0.08	R	T4	LEFT	R	NO	LEFT	R	NO	RIGHT	L	NO	RIGHT	YES	T5	LEFT	R	YES	LEFT	R	NO	RIGHT	L	YES	LEFT
10.10.19	10	3.6	3.53	-0.07	R	3.56	3.4	-0.16	R	3.39	3.18	-0.21	R	T5	3.55	3.53	-0.02	R	3.62	3.43	-0.19	R	3.56	3.4	-0.16	R	T4	RIGHT	L	NO	LEFT	R	NO	LEFT	R	YES	LEFT	NO	T4	RIGHT	L	NO	LEFT	R	YES	LEFT	R	NO	LEFT
10.10.19	11	3.35	3.36	0.01	L	2.87	3.04	0.17	L	2.77	2.85	0.08	L	T4	2.94	3.26	0.32	L	2.81	2.71	-0.1	R	2.85	2.6	-0.25	R	T3	LEFT	R	NO	LEFT	R	NO	LEFT	R	YES	RIGHT	NO	T4	RIGHT	L	NO	RIGHT	L	YES	LEFT	R	YES	LEFT
10.10.19	12	3.15	2.55	-0.6	R	2.79	2.51	-0.28	R	2.81	2.6	-0.21	R	T3	3.08	2.63	-0.45	R	2.88	2.57	-0.31	R	2.47	2.47	0	NEUTRAL	T3	RIGHT	L	NO	RIGHT	L	NO	LEFT	R	YES	LEFT	YES	T5	LEFT	R	NO	RIGHT	L	NO	LEFT	R	YES	LEFT
11.14.19	2	3.67	3.72	0.05	L	3.32	3.92	0.6	L	4.23	4.56	0.33	L	T4	3.51	3.41	-0.1	R	3.32	3.17	-0.15	R	3.31	3.45	0.14	L	T4	LEFT	R	NO	RIGHT	L	NO	RIGHT	L	YES	LEFT	NO	T4	LEFT	R	YES	LEFT	R	NO	RIGHT	L	YES	RIGHT
11.14.19	3	3.21	3.1	-0.11	R	3.22	2.59	-0.63	R	3.26	2.87	-0.39	R	T4	3.23	3	-0.23	R	2.9	3.03	0.13	L	2.97	2.62	-0.35	R	T5	LEFT	R	NO	LEFT	R	NO	LEFT	R	NO	RIGHT	YES	T5	RIGHT	L	NO	LEFT	R	NO	LEFT	R	NO	LEFT
11.14.19	5	3.44	3.35	-0.09	R	3.03	3.07	0.04	L	2.89	3.14	0.25	L	T5	3.37	3.25	-0.12	R	3.14	3.15	0.01	L	2.89	3.17	0.28	L	T5	RIGHT	L	NO	RIGHT	L	NO	LEFT	R	NO	RIGHT	YES	T5	RIGHT	L	NO	RIGHT	L	YES	LEFT	R	YES	RIGHT
11.14.19	6	3.37	3.03	-0.34	R	2.99	3.05	0.06	L	3.11	3.07	-0.04	R	T3	2.96	2.91	-0.05	R	2.7	3	0.3	L	2.99	3.16	0.17	L	T5	LEFT	R	NO	LEFT	R	YES	RIGHT	L	NO	RIGHT	NO	T3	LEFT	R	YES	RIGHT	L	NO	LEFT	R	YES	RIGHT
11.14.19	7	3.15	3.43	0.28	L	3.32	3.21	-0.11	R	3.52	3.34	-0.18	R	T3	3.28	3.13	-0.15	R	3.26	3.19	-0.07	R	3.27	3.21	-0.06	R	T3	LEFT	R	NO	LEFT	R	NO	RIGHT	L	NO	LEFT	YES	T5	RIGHT	L	NO	RIGHT	L	YES	LEFT	R	YES	RIGHT
11.14.19	8	3.23	3.24	0.01	L	3.07	2.74	-0.33	R	2.88	2.62	-0.26	R	T4	3	2.98	-0.02	R	3.03	2.79	-0.24	R	3.01	2.82	-0.19	R	T4	RIGHT	L	NO	LEFT	R	NO	LEFT	R	YES	RIGHT	NO	T4	LEFT	R	NO	RIGHT	L	YES	RIGHT	L	YES	RIGHT
11.14.19	9	3.69	3.76	0.07	L	3.55	3.51	-0.04	R	3.41	3.77	0.36	L	T5	3.75	3.97	0.22	L	3.92	3.88	-0.04	R	3.56	3.62	0.06	L	T3	LEFT	R	NO	LEFT	R	NO	LEFT	R	NO	RIGHT	YES	T5	LEFT	R	YES	RIGHT	L	YES	RIGHT	L	NO	RIGHT
11.14.19	10	3.63	3.57	-0.06	R	3.47	3.51	0.04	L	2.8	3.01	0.21	L	T5	3.61	3.47	-0.14	R	3.5	3.57	0.07	L	3.3	3.69	0.39	L	T5	LEFT	R	NO	RIGHT	L	NO	LEFT	R	YES	LEFT	YES	T4	LEFT	R	NO	LEFT	R	YES	LEFT	R	YES	LEFT
11.14.19	11	2.92	2.88	-0.04	R	2.83	3.01	0.18	L	2.91	2.93	0.02	L	T4	2.96	2.95	-0.01	R	2.67	2.8	0.13	L	2.41	2.53	0.12	L	T4	LEFT	R	NO	LEFT	R	NO	LEFT	R	YES	RIGHT	NO	T4	LEFT	R	YES	LEFT	R	YES	LEFT	R	NO	RIGHT
11.14.19	12	2.58	2.88	0.3	L	2.73	2.82	0.09	L	2.74	2.99	0.25	L	T3	3.07	2.78	-0.29	R	2.56	2.82	0.26	L	2.51	2.91	0.4	L	T5	LEFT	R	NO	LEFT	R	NO	RIGHT	L	YES	LEFT	NO	T4	LEFT	R	YES	RIGHT	L	NO	RIGHT	L	YES	LEFT
11.14.19	13	3.85	3.97	0.12	L	3.75	3.54	-0.21	R	3.57	3.72	0.15	L	T4	3.76	3.8	0.04	L	3.16	3.75	0.59	L	3.33	3.43	0.1	L	T4	RIGHT	L	NO	LEFT	R	NO	RIGHT	L	NO	RIGHT	YES	T5	RIGHT	L	YES	RIGHT	L	NO	RIGHT	L	NO	RIGHT
11.14.19	14	3.63	3.74	0.11	L	3.2	3.29	0.09	L	3.2	3.35	0.15	L	T5	3.49	3.59	0.1	L	3.14	3.15	0.01	L	3	3.21	0.21	L	T5	LEFT	R	NO	LEFT	R	NO	RIGHT	L	NO	LEFT	YES	T5	LEFT	R	NO	RIGHT	L	NO	LEFT	R	YES	LEFT
11.14.19	15	3.23	2.82	-0.41	R	3.05	3.08	0.03	L	3.04	3.03	-0.01	R	T3	2.9	2.81	-0.09	R	3.01	2.9	-0.11	R	2.89	2.88	-0.01	R	T4	LEFT	R	NO	LEFT	R	NO	LEFT	R	NO	LEFT	YES	T5	RIGHT	L	YES	RIGHT	L	NO	RIGHT	L	YES	LEFT
11.14.19	16	3.5	3.4	-0.1	R	3.27	3.2	-0.07	R	3.23	3.2	-0.03	R	T3	3.4	3.36	-0.04	R	2.99	3.1	0.11	L	3.17	2.88	-0.29	R	T5	LEFT	R	NO	RIGHT	L	NO	LEFT	R	NO	LEFT	YES	T5	RIGHT	L	YES	LEFT	R	NO	LEFT	R	YES	LEFT
11.14.19	17	3.38	3.42	0.04	L	2.92	3.34	0.42	L	3.86	3.34	-0.52	R	T5	3.5	3.41	-0.09	R	3.02	3.59	0.57	L	2.92	2.94	0.02	L	T4	LEFT	R	NO	RIGHT	L	YES	RIGHT	L	NO	LEFT	NO	T3	LEFT	R	YES	LEFT	R	YES	RIGHT	L	NO	LEFT
12.12.19	1	3.39	3.49	0.1	L	3.16	3.15	-0.01	R	3.18	3.32	0.14	L	T5	3.12	3.11	-0.01	R	3.16	3.16	0	NEUTRAL	3.15	3.33	0.18	L	T5	RIGHT	L	NO	LEFT	R	NO	LEFT	R	YES	LEFT	NO	T4	LEFT	R	YES	RIGHT	L	NO	LEFT	R	YES	LEFT
12.12.19	2	2.8	2.71	-0.09	R	2.89	2.83	-0.06	R	3.73	3.78	0.05	L	T3	3.2	3.69	0.49	L	2.38	2.24	-0.14	R	2.3	2.22	-0.08	R	T3	LEFT	R	NO	RIGHT	L	YES	RIGHT	L	NO	RIGHT	NO	T3	LEFT	R	YES	RIGHT	L	YES	LEFT	R	NO	RIGHT
12.12.19	3	3.19	2.87	-0.32	R	2.76	2.71	-0.05	R	2.74	3.05	0.31	L	T3	2.91	3.2	0.29	L	2.92	2.57	-0.35	R	2.85	2.63	-0.22	R	T4	LEFT	R	NO	LEFT	R	NO	LEFT	R	NO	RIGHT	YES	T5	RIGHT	L	NO	LEFT	R	NO	LEFT	R	YES	LEFT
12.12.19	4	3.93	3.56	-0.37	R	3.8	3.69	-0.11	R	3.39	3.4	0.01	L	T3	3.56	3.86	0.3	L	3.4	3.56	0.16	L	3.38	3.38	0	NEUTRAL	T3	RIGHT	L	NO	LEFT	R	NO	LEFT	R	NO	LEFT	YES	T5	RIGHT	L	YES	LEFT	R	YES	LEFT	R	YES	LEFT
12.12.19	5	3.31	3.85	0.54	L	3.72	3.35	-0.37	R	3.34	3.52	0.18	L	T3	3.3	3.86	0.56	L	3.58	3.3	-0.28	R	3.06	3.77	0.71	L	T5	LEFT	R	NO	RIGHT	L	NO	LEFT	R	YES	RIGHT	NO	T4	LEFT	R	YES	LEFT	R	YES	LEFT	R	NO	LEFT
12.12.19	6	3.64	2.93	-0.71	R	3.04	3.07	0.03	L	3.06	3.19	0.13	L	T3	3.43	3.17	-0.26	R	3.01	2.94	-0.07	R	3.2	3.31	0.11	L	T3	LEFT	R	NO	RIGHT	L	NO	LEFT	R	NO	RIGHT	YES	T5	LEFT	R	YES	RIGHT	L	NO	LEFT	R	YES	LEFT
12.12.19	8	4.02	3.6	-0.42	R	3.01	3.09	0.08	L	3.37	3.04	-0.33	R	T3	3.57	3.59	0.02	L	2.72	3.08	0.36	L	2.71	2.6	-0.11	R	T4	LEFT	R	NO	RIGHT	L	NO	LEFT	R	YES	RIGHT	NO	T4	LEFT	R	YES	RIGHT	L	YES	RIGHT	L	YES	LEFT
12.12.19	9	3.14	3.52	0.38	L	3.25	3.23	-0.02	R	3.22	2.95	-0.27	R	T3	2.99	3.24	0.25	L	3.1	3.22	0.12	L	3.3	2.94	-0.36	R	T5	LEFT	R	NO	RIGHT	L	NO	LEFT	R	NO	LEFT	YES	T5	RIGHT	L	NO	RIGHT	L	YES	RIGHT	L	YES	RIGHT
12.12.19	10	3.17	3.02	-0.15	R	3.13	3.21	0.08	L	2.87	2.97	0.1	L	T3	2.9	2.89	-0.01	R	2.67	2.87	0.2	L	2.7	2.99	0.29	L	T5	LEFT	R	NO	RIGHT	L	NO	LEFT	R	NO	LEFT	YES	T5	LEFT	R	NO	RIGHT	L	YES	LEFT	R	NO	LEFT
12.12.19	11	3.38	3.29	-0.09	R	2.97	3.16	0.19	L	2.89	2.96	0.07	L	T4	2.75	2.95	0.2	L	2.63	2.9	0.27	L	2.67	2.7	0.03	L	T4	LEFT	R	NO	RIGHT	L	NO	LEFT	R	YES	LEFT	NO	T4	RIGHT	L	NO	LEFT	R	NO	LEFT	R	YES	LEFT
12.12.19	12	3.32	3.16	-0.16	R	2.85	2.81	-0.04	R	3.22	2.31	-0.91	R	T5	3.2	3.26	0.06	L	2.77	2.46	-0.31	R	2.96	2.34	-0.62	R	T5	LEFT	R	NO	LEFT	R	NO	RIGHT	L	YES	RIGHT	YES	T4	LEFT	R	YES	LEFT	R	YES	LEFT	R	YES	RIGHT
12.12.19	14	3.31	3.37	0.06	L	3.01	3.1	0.09	L	2.95	2.91	-0.04	R	T4	3.2	3	-0.2	R	2.56	2.9	0.34	L	3	2.77	-0.23	R	T4	LEFT	R	NO	RIGHT	L	NO	LEFT	R	YES	RIGHT	NO	T4	LEFT	R	NO	LEFT	R	YES	LEFT	R	YES	RIGHT
12.12.19	15	2.96	2.88	-0.08	R	3.03	2.48	-0.55	R	2.96	3.01	0.05	L	T4	2.85	2.65	-0.2	R	3.02	2.62	-0.4	R	2.68	2.67	-0.01	R	T4	LEFT	R	NO	RIGHT	L	NO	RIGHT	L	NO	LEFT	YES	T5	LEFT	R	YES	LEFT	R	YES	LEFT	R	NO	LEFT
12.12.19	16	3.42	3.18	-0.24	R	3.07	3.13	0.06	L	3.34	3.02	-0.32	R	T5	3.62	3.33	-0.29	R	3.07	2.8	-0.27	R	3.04	2.67	-0.37	R	T5	RIGHT	L	NO	RIGHT	L	NO	LEFT	R	NO	RIGHT	YES	T5	RIGHT	L	YES	RIGHT	L	NO	LEFT	R	NO	LEFT
12.12.19	17	3.28	2.95	-0.33	R	3.26	3.07	-0.19	R	3.07	3.28	0.21	L	T3	3.22	2.91	-0.31	R	3.22	2.91	-0.31	R	2.73	2.97	0.24	L	T3/T4	LEFT	R	NO	RIGHT	L	NO	LEFT	R	YES	RIGHT	NO	T4	LEFT	R	YES	LEFT	R	NO	RIGHT	L	YES	LEFT
1.13.20	1	3.4	2.78	-0.62	R	3.01	2.9	-0.11	R	2.73	2.86	0.13	L	T3	2.9	2.99	0.09	L	2.53	2.96	0.43	L	2.56	2.98	0.42	L	T4	LEFT	R	NO	RIGHT	L	NO	RIGHT	L	YES	LEFT	NO	T4	RIGHT	L	NO	RIGHT	L	YES	LEFT	R	NO	LEFT
1.13.20	2	3.13	3.1	-0.03	R	2.8	2.96	0.16	L	2.92	3.07	0.15	L	T4	3.11	3.16	0.05	L	2.5	3.22	0.72	L	2.81	3.06	0.25	L	T4	LEFT	R	NO	LEFT	R	NO	RIGHT	L	NO	LEFT	YES	T5	LEFT	R	YES	LEFT	R	NO	LEFT	R	YES	LEFT
1.13.20	3	3.34	3.6	0.26	L	3.64	3.82	0.18	L	3.75	3.47	-0.28	R	T5	3.38	3.48	0.1	L	3.5	3.46	-0.04	R	3.49	3.4	-0.09	R	T3	LEFT	R	NO	RIGHT	L	YES	LEFT	R	NO	RIGHT	NO	T3	RIGHT	L	YES	RIGHT	L	NO	LEFT	R	YES	LEFT
1.13.20	4	2.94	3.17	0.23	L	2.9	2.91	0.01	L	2.56	2.82	0.26	L	T5	2.69	2.74	0.05	L	2.79	2.58	-0.21	R	2.67	2.24	-0.43	R	T5	LEFT	R	NO	RIGHT	L	NO	LEFT	R	YES	RIGHT	NO	T4	LEFT	R	NO	RIGHT	L	NO	RIGHT	L	YES	RIGHT
1.13.20	5	3.81	3.25	-0.56	R	3.79	3.21	-0.58	R	3.38	3.32	-0.06	R	T4	4.18	3.42	-0.76	R	3.65	3.14	-0.51	R	3.24	3.25	0.01	L	T3	RIGHT	L	NO	LEFT	R	NO	RIGHT	L	YES	LEFT	NO	T4	RIGHT	L	NO	LEFT	R	YES	LEFT	R	YES	LEFT
1.13.20	6	3.49	3.43	-0.06	R	3.45	3.32	-0.13	R	3.02	3.26	0.24	L	T5	3.25	3.44	0.19	L	3.3	3.36	0.06	L	3.11	3.27	0.16	L	T3	RIGHT	L	NO	RIGHT	L	NO	LEFT	R	YES	LEFT	NO	T4	LEFT	R	YES	RIGHT	L	NO	LEFT	R	YES	LEFT
1.13.20	7	3.2	3.06	-0.14	R	3.2	2.67	-0.53	R	3.09	2.88	-0.21	R	T4	3.25	2.86	-0.39	R	3.13	2.53	-0.6	R	2.77	2.61	-0.16	R	T4	RIGHT	L	NO	RIGHT	L	NO	LEFT	R	NO	LEFT	YES	T5	RIGHT	L	NO	LEFT	R	NO	LEFT	R	YES	LEFT
1.13.20	8	3.49	3.52	0.03	L	3.29	3.37	0.08	L	3.51	2.98	-0.53	R	T5	3.5	3.27	-0.23	R	3.33	2.93	-0.4	R	3.12	2.97	-0.15	R	T4	LEFT	R	NO	RIGHT	L	YES	LEFT	R	NO	RIGHT	NO	T3	LEFT	R	YES	LEFT	R	YES	RIGHT	L	NO	RIGHT
1.13.20	9	2.96	2.83	-0.13	R	2.7	2.68	-0.02	R	2.98	2.76	-0.22	R	T5	2.68	2.79	0.11	L	2.65	2.8	0.15	L	2.84	2.74	-0.1	R	T4	RIGHT	L	NO	RIGHT	L	NO	LEFT	R	YES	RIGHT	NO	T4	RIGHT	L	NO	LEFT	R	YES	LEFT	R	YES	LEFT
1.13.20	10	3.21	3.01	-0.2	R	3.37	3.02	-0.35	R	2.98	2.99	0.01	L	T4	3.17	2.81	-0.36	R	3.2	2.86	-0.34	R	3.04	2.63	-0.41	R	T5	RIGHT	L	NO	RIGHT	L	NO	LEFT	R	YES	LEFT	NO	T4	RIGHT	L	NO	RIGHT	L	NO	LEFT	R	YES	LEFT
1.13.20	12	3.21	3.45	0.24	L	3.2	3.14	-0.06	R	2.92	3.23	0.31	L	T5	2.86	3.05	0.19	L	2.79	2.94	0.15	L	2.64	2.67	0.03	L	T3	LEFT	R	NO	LEFT	R	NO	RIGHT	L	NO	LEFT	YES	T5	LEFT	R	NO	LEFT	R	YES	RIGHT	L	YES	LEFT
1.13.20	13	3.04	2.9	-0.14	R	2.79	2.72	-0.07	R	2.84	2.44	-0.4	R	T5	2.91	2.78	-0.13	R	2.55	2.68	0.13	L	2.56	2.32	-0.24	R	T5	LEFT	R	NO	RIGHT	L	YES	LEFT	R	NO	LEFT	YES	T5	LEFT	R	YES	RIGHT	L	NO	LEFT	R	YES	LEFT
1.13.20	14	3.64	3.73	0.09	L	3.92	3.76	-0.16	R	3.33	3.79	0.46	L	T5	3.47	3.54	0.07	L	3.37	3.5	0.13	L	3.21	3.82	0.61	L	T5	RIGHT	L	NO	RIGHT	L	NO	RIGHT	L	YES	LEFT	NO	T4	LEFT	R	YES	RIGHT	L	NO	LEFT	R	NO	LEFT
1.13.20	15	3.38	3.67	0.29	L	3.55	3.25	-0.3	R	3.54	3.26	-0.28	R	T4	3.29	3.49	0.2	L	3.66	2.76	-0.9	R	3.4	2.65	-0.75	R	T5	LEFT	R	NO	LEFT	R	NO	RIGHT	L	NO	LEFT	YES	T5	LEFT	R	YES	RIGHT	L	YES	RIGHT	L	YES	LEFT
1.30.20	2	3.29	3.08	-0.21	R	3.31	2.75	-0.56	R	3.29	2.67	-0.62	R	T5	3.41	3.31	-0.1	R	3.14	2.98	-0.16	R	3.01	2.82	-0.19	R	T5	LEFT	R	NO	RIGHT	L	NO	LEFT	R	NO	LEFT	YES	T5	LEFT	R	YES	LEFT	R	NO	RIGHT	L	NO	RIGHT
1.30.20	3	3.3	3.36	0.06	L	3.27	3.66	0.39	L	3.4	3.72	0.32	L	T4	3.12	3.11	-0.01	R	3.47	3.14	-0.33	R	2.88	2.94	0.06	L	T4	RIGHT	L	NO	RIGHT	L	YES	RIGHT	L	NO	LEFT	NO	T3	RIGHT	L	YES	RIGHT	L	YES	RIGHT	L	YES	LEFT
1.30.20	4	2.91	2.78	-0.13	R	2.63	2.66	0.03	L	2.78	2.36	-0.42	R	T5	3.03	2.98	-0.05	R	2.75	2.65	-0.1	R	2.44	2.27	-0.17	R	T5	LEFT	R	NO	RIGHT	L	NO	LEFT	R	YES	RIGHT	NO	T4	LEFT	R	YES	RIGHT	L	NO	LEFT	R	YES	LEFT
1.30.20	5	3.17	3.01	-0.16	R	2.89	2.97	0.08	L	2.79	3	0.21	L	T5	2.85	3.08	0.23	L	2.86	3.16	0.3	L	2.73	2.51	-0.22	R	T4	LEFT	R	NO	LEFT	R	YES	RIGHT	L	NO	LEFT	YES	T5	LEFT	R	YES	RIGHT	L	NO	LEFT	R	YES	LEFT
1.30.20	6	3	3.02	0.02	L	2.78	2.82	0.04	L	2.68	2.48	-0.2	R	T5	2.91	2.9	-0.01	R	2.5	2.55	0.05	L	2.24	2.04	-0.2	R	T5	LEFT	R	NO	RIGHT	L	NO	LEFT	R	NO	LEFT	YES	T5	LEFT	R	NO	LEFT	R	NO	RIGHT	L	YES	RIGHT
1.30.20	7	3.76	3.68	-0.08	R	3.73	3.44	-0.29	R	3.62	3.52	-0.1	R	T4	3.41	3.23	-0.18	R	3.19	3.2	0.01	L	3.33	3.16	-0.17	R	T3	LEFT	R	NO	LEFT	R	NO	RIGHT	L	NO	LEFT	YES	T5	RIGHT	L	NO	LEFT	R	YES	RIGHT	L	NO	LEFT
1.30.20	8	3.08	3.13	0.05	L	3.07	2.87	-0.2	R	2.99	2.76	-0.23	R	T5	3.07	3.14	0.07	L	3.12	2.75	-0.37	L	2.91	2.8	-0.11	L	T4	LEFT	R	NO	LEFT	R	NO	RIGHT	L	NO	RIGHT	YES	T5	RIGHT	L	NO	LEFT	R	YES	LEFT	R	YES	RIGHT
1.30.20	9	3.36	3.01	-0.35	R	3.19	2.85	-0.34	R	2.53	3.05	0.52	L	T5	3.4	2.77	-0.63	R	2.84	2.87	0.03	L	2.74	2.83	0.09	L	T3	RIGHT	L	NO	LEFT	R	NO	RIGHT	L	YES	LEFT	YES	T4	RIGHT	L	NO	LEFT	R	YES	RIGHT	L	NO	RIGHT
1.30.20	10	2.87	2.79	-0.08	R	2.79	3.07	0.28	L	2.72	2.79	0.07	L	T4	2.76	3.06	0.3	L	2.89	2.77	-0.12	R	3.06	2.8	-0.26	R	T3	LEFT	R	NO	LEFT	R	YES	RIGHT	L	NO	LEFT	YES	T3	LEFT	R	NO	LEFT	R	NO	LEFT	R	YES	LEFT
1.30.20	11	3.48	3.41	-0.07	R	3.32	2.79	-0.53	R	2.8	2.65	-0.15	R	T4	3.89	3.36	-0.53	R	3.14	2.82	-0.32	R	2.52	2.49	-0.03	R	T3	RIGHT	L	NO	LEFT	R	NO	LEFT	R	YES	RIGHT	NO	T4	RIGHT	L	NO	RIGHT	L	YES	LEFT	R	YES	LEFT
1.30.20	12	3.96	3.89	-0.07	R	3.46	3.54	0.08	L	3.09	3.21	0.12	L	T5	3.72	3.93	0.21	L	3.42	2.94	-0.48	R	3.16	3.09	-0.07	R	T4	LEFT	R	NO	LEFT	R	NO	RIGHT	L	YES	LEFT	NO	T4	LEFT	R	YES	LEFT	R	YES	RIGHT	L	NO	RIGHT
TOTAL	66		avg US diff (absolute):	0.192424				0.189242				0.223939					0.201364				0.229545				0.207727
							R	-8.41			R	-7.69				R	-7.57			R	-8.92			R	-7.92
			R	-8.56			L	4.08			L	7.09				L	5.72			L	6.23			L	5.79
			L	3.76
			average all:	0.207374
			US absolute
[truncated: 2 more columns]
